# Supplementary material for: High-dose vitamin D supplementation in multiple sclerosis – results from the randomized EVIDIMS (efficacy of vitamin D supplementation in multiple sclerosis) trial
Source: PubMed Central journal article supplement — Mult Scler J Exp Transl Clin. 2020 Jan 24;6(1):2055217320903474. doi: 10.1177/2055217320903474 (PMC6984434; doi:10.1177/2055217320903474), 2020-01-24
Supplement: MSO903474_Supplemental_material.pdf [file MSO903474_Supplemental_material.pdf]

# Supplementary Information

## Methods

### 1. Study sites (all northern part of Germany)

| Site                                                                                                                  | Principal Investigator |
|-----------------------------------------------------------------------------------------------------------------------|------------------------|
| 01 NeuroCure Clinical Research Center, Charité – Universitätsmedizin Berlin, Charitéplatz 1, 10117 Berlin             | PD Dr. J. Dörr         |
| 02 Private Neurologist, Berlin                                                                                        | Dr. E. Becker          |
| 03 Private Neurologist, Berlin                                                                                        | Dr. B. Brockmeier      |
| 04 Private Neurologist, Berlin                                                                                        | Dr. K. Anvari          |
| 05 Klinik für Neurologie, Alexianer St. Josefs Krankenhaus Potsdam, Allee nach Sanssouci 7, 14471 Potsdam             | PD Dr. O. Hoffmann     |
| 06 Klinik für Neurologie, Krankenhaus Martha-Maria Halle-Dörlau gGmbH, Röntgenstraße 1, 06120 Halle                   | Dr. F. Hoffmann        |
| 07 Kliniken für Neurologie Teupitz/Lübben, Asklepios Fachkliniken Brandenburg GmbH, Buchholzer Str. 21, 15755 Teupitz | Prof. Dr. J. Faiss     |

### 2. Inclusion and exclusion criteria

#### 2.1. Inclusion

- Written informed consent
- Age 18 to 65 (at randomization)
- Multiple sclerosis according to revised McDonald criteria (2005) or clinically isolated syndrome (CIS)

- Relapsing remitting disease course
- No relapse within 30 days prior to randomization
- Expanded disability status scale (EDSS)  $\leq 6.0$
- Continuous treatment with interferon- $\beta$ 1b for at least 3 months (at randomization)
- Exclusion of pregnancy and reliable contraception in women of childbearing potential (Pearl index  $<1$ )

## 2.2. Exclusion

- Any other disease courses than relapsing remitting
- Any other disease that might better explain symptoms and signs in the patient
- Any condition that might interfere with cranial MRI including gadolinium-DTPA application or other relevant examinations
- Vitamin D supplementation  $>500$  IU/day within 6 months prior to randomization.
- History of allergic reaction to colecalciferol
- History of sarcoidosis, nephrolithiasis, pseudo hypoparathyroidism
- Relevant liver disease (incl. neoplasia, chronic hepatitis, history of liver failure, cholestasis, ALAT, ASAT  $> 3.5x$  upper limit of normal, bilirubin  $> 2.0$  mg/dl)
- Renal or bone marrow dysfunction defined by hemoglobin  $< 8,5$  g/dl, WBC  $< 2,5/nl$  platelets  $< 100/nl$ , creatinin clearance (Cockroft-Gault)  $< 110ml/min$  (males) and  $< 95ml/min$  (females)
- Hypercalcaemia  $>2,7$  mmol/l, urine calcium/creatinin ratio  $>1$
- Concomitant medication with hydrochlorothiazide, digitoxin, digoxin, phenytoin, barbiturates, other vitamin D-containing preparations than study medication
- Pregnancy or lactation
- Participation in other interventional clinical trials within 3 months before or any time during the trial
- Medical, psychiatric or other condition that relevantly limits the ability of the patient to provide informed consent, or to comply with the protocol
- Lack of agreement with data protection guidelines
